# Supplementary material for: A Novel Mouse Model of Enteric Vibrio parahaemolyticus Infection Reveals that the Type III Secretion System 2 Effector VopC Plays a Key Role in Tissue Invasion and Gastroenteritis
Source: PubMed Central journal article supplement (PMC6918077; doi:10.1128/mbio.02608-19), 2019-12-17

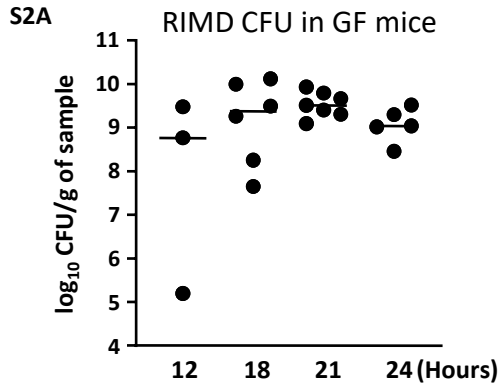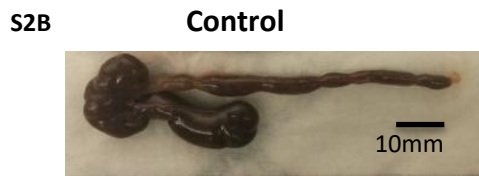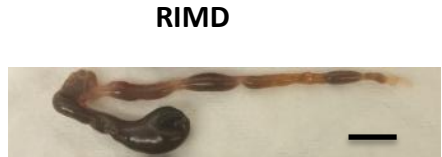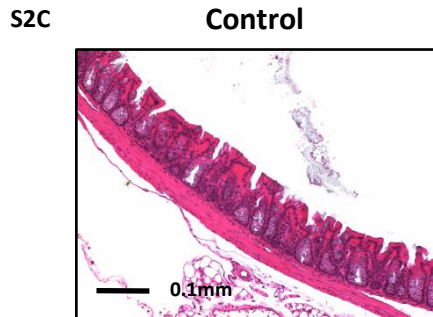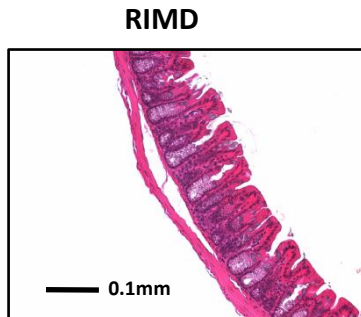

Supplement: mBio.02608-19-sf002.pdf [file mBio.02608-19-sf002.pdf]
