# Supplementary material for: A Novel Mouse Model of Enteric Vibrio parahaemolyticus Infection Reveals that the Type III Secretion System 2 Effector VopC Plays a Key Role in Tissue Invasion and Gastroenteritis
Source: PubMed Central journal article supplement (PMC6918077; doi:10.1128/mbio.02608-19), 2019-12-17
Supplement: mBio.02608-19-st001.pdf [file mBio.02608-19-st001.pdf]

Table 1. RIMD2210633 and its mutant strains

| Strain             | TdhA & TdhS | T3SS1 | T3SS2 | effector VopC |
|--------------------|-------------|-------|-------|---------------|
| RIMD               | +           | +     | +     | +             |
| POR1               | -           | +     | +     | +             |
| POR2               | -           | -     | +     | +             |
| POR3               | -           | +     | -     | -             |
| POR2 $\Delta$ VopC | -           | -     | +     | -             |
